# Supplementary material for: Multisite phosphorylation of P-Rex1 by protein kinase C
Source: PubMed Central journal article supplement (PMC5363633; doi:10.18632/oncotarget.12846), 2016-10-24
Supplement: oncotarget-07-77937-s001.pdf [file oncotarget-07-77937-s001.pdf]

## **Multisite phosphorylation of P-Rex1 by protein kinase C**

### **SUPPLEMENTARY TABLE**

**Supplementary Table S1: Scansite results of P-Rex1.**

**See Supplementary File 1**
